# Supplementary material for: Biocompatibility and Bone Formation of Flexible, Cotton Wool-like PLGA/Calcium Phosphate Nanocomposites in Sheep
Source: PubMed Central journal article supplement — Open Orthop J. 2011 Mar 16;5:63–71. doi: 10.2174/1874325001105010063 (PMC3092473; doi:10.2174/1874325001105010063), 2011-03-16
Supplement: TOORTHJ-5-63_SD1.pdf [file TOORTHJ-5-63_SD1.pdf]

# SUPPLEMENTARY MATERIAL 1

## Preparation and Characterisation of Cotton Wool Like PLGA/CaP Nanocomposites

### Calcium Phosphate Nanoparticles Preparation and Characterisation

X-ray diffraction (XRD)-amorphous calcium phosphate (CaP,  $\text{Ca}_3(\text{PO}_4)_2$ ) and silver calcium phosphate (Ag-CaP, 1 wt% Ag on CaP) nanoparticles were prepared using flame spray synthesis. Briefly, tributyl phosphate (Fluka, puriss), calcium- and silver carboxylates were mixed in the corresponding ratio (Ca/P = 1.5) and fed into a methane/oxygen flame. The nanopowders were collected on glass fibre filters, sieved (250  $\mu\text{m}$  mesh) and thoroughly investigated. XRD-spectra were collected on X'Pert PRO-MPD (PANalytical,  $\text{CuK}\alpha$  radiation, X'Celerator linear detector system, step size of 0.0338, ambient conditions). Fourier transform infrared (FTIR) spectroscopy (Tensor 27, Bruker Optics, 4  $\text{cm}^{-1}$  resolution, 1 wt% powder in KBr) was routinely used to confirm the phase purity. The specific surface area (SSA) of the as-prepared particles was determined by BET (Brunauer-Emmet-Teller) measurement (Tristar 3000, Micromeritics). For TEM (transmission electron microscopy) investigation, the material was deposited onto a holey carbon foil supported on a carbon grid. TEM images were recorded on a CM30ST microscope (LaB<sub>6</sub> cathode, operated at 300 kV, point resolution  $\sim 4\text{\AA}$ ) to study the morphology and to confirm the particle size. The silver content in the Ag-CaP nanopowder was analysed by flame atomic-absorption spectroscopy (AAS) on a Varian SpectraAA 220FS at a flame composition of 13.5 l/min air (PanGas) and 2.1 l/min acetylene (PanGas) and measuring the adsorption at a wavelength of 328.1 nm.

### Bone Cotton Wool Preparation and Characterization

Clinically approved poly(lactide-co-glycolide) (PLGA) was purchased from Boehringer Ingelheim with a copolymer ratio of 85:15 (Resomer® Sample MD Type RG) and with a weight and number average molecular weight of 305'440 g/mol and 110'500 g/mol, respectively. PLGA/CaP 60:40 and PLGA/Ag-CaP 60:40 (total silver concentration in scaffold = 0.4 wt%) scaffolds were fabricated by low-temperature electrospinning. Briefly, the nanoparticles were dispersed in chloroform (Riedel de Haen, Ph. Eur.) using an ultrasonic processor (320 W, 5 min) and by the addition of 8 wt% surfactant (Polysorbate20, Fluka, Ph. Eur.) with respect to the particles. PLGA was subsequently added and dissolved under magnetic stirring (15 h) to a concentration of 8 wt% in chloroform. The electrospinning solutions were pumped with a flow rate of 2 ml/h (KD Scientific syringe pump) through a capillary (inner diameter = 1.0 mm) connected to a DC high voltage supply (Glassman, EL Series) operated at 20 kV. To prevent the exit from clogging, the needle tip was kept in a chloroform saturated air stream by using a concentrically mounted sheath tube. The fibres were sprayed for 45 min onto a rotating (130 rpm), hollow and grounded tube (diameter = 8 cm) covered with an aluminium foil. This collector was previously loaded with dry ice (frozen  $\text{CO}_2$ , average temperature 195 K) which resulted in rapid deposition of ice crystals at the cold (200-220 K) external surface. The relative humidity during electrospinning was 35 % and the distance between the needle tip (transversal movement = 5 cm) and the collector was maintained at 10 cm. Directly after low-temperature electrospinning the as-prepared scaffolds were dried in a vacuum oven (20 mbar, room temperature, 12 h). Scanning electron microscopy (SEM, LEO 1530 Gemini) was routinely used to investigate the morphology of the electrospun fibres after coating with a 4 nm platinum layer.

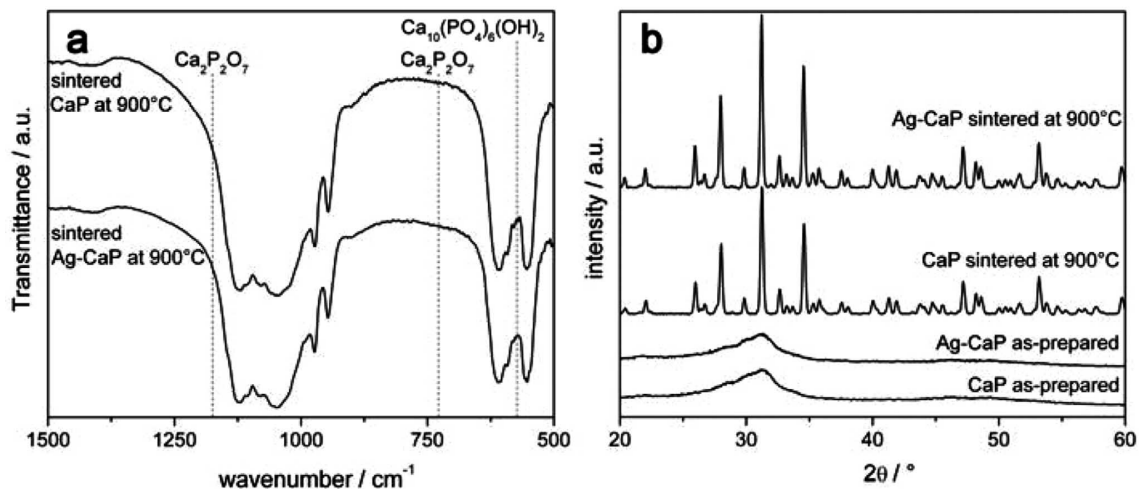

(Suppl. Fig. 1). Characterisation of flame spray synthesized nanoparticles: (a) Fourier transform infrared spectra of as-prepared CaP and Ag-CaP nanoparticles. Distinct peaks characteristic for  $\beta$ -TCP after sintering and the absence of impurities such as hydroxyapatite ( $575\text{ cm}^{-1}$ ) and calcium pyrophosphate ( $727\text{ cm}^{-1}$  and  $1140\text{-}1215\text{ cm}^{-1}$ ) confirm the purity of the material. (b) Broad XRD pattern of as-prepared amorphous CaP/Ag-CaP nanoparticles and peaks characteristic for  $\beta$ -TCP after sintering at  $900^\circ\text{C}$ .

## SUPPLEMENTARY MATERIAL 2

### Evaluated Zones in the Former Defect for Semi-Quantitative Histological Evaluation

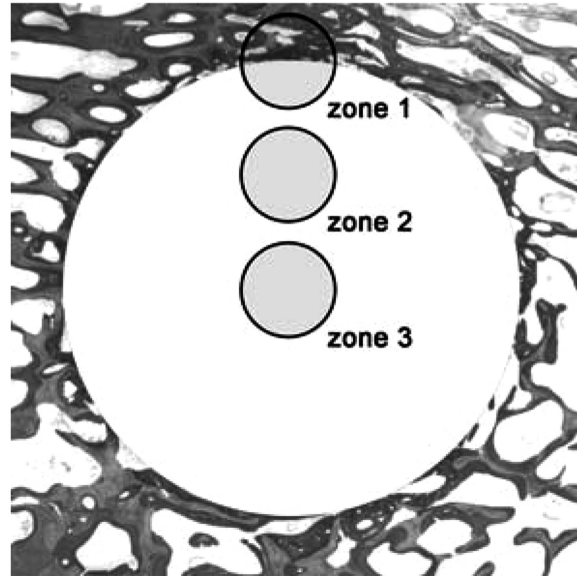

Schematic description of the three different zones investigated in the semi-quantitative histological evaluation applying a score system.

## SUPPLEMENTARY MATERIAL 3

### Microradiographs

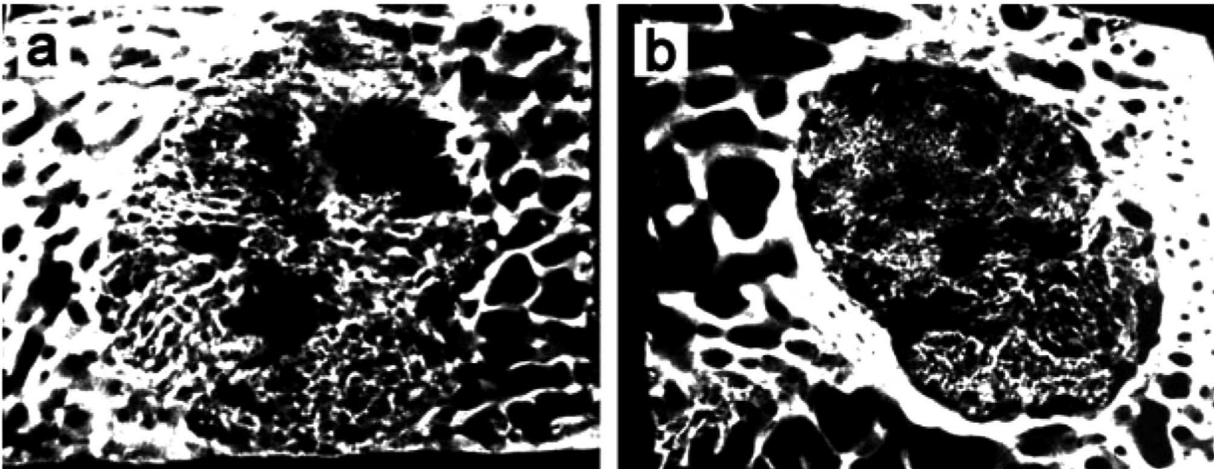

Microradiographs after eight weeks implantation of bone cotton wool-like PLGA/CaP. (a) sheep 3118 femur left proximal and (b) sheep 3119 humerus left proximal.

## SUPPLEMENTARY MATERIAL 4

### Semi-Quantitative Analysis of the Cellular Content After 8 Weeks Implantation

**Suppl. Table 1. Semi-Quantitative Analysis of the Cellular Content After 8 Weeks Implantation of PLGA/CaP and PLGA/Ag-CaP Applying a Score System in Three Different Zones from Border to Centre of the Former Defect: Scores (0 for 0%, 1 for 1-25%, 2 for 26-50%, 3 for > 50%) for Percentage Fraction of the Cells Per Power Field and the Corresponding Sum for Each Defect**

| Sheep | Defect  | Ag | Lymphocytes/Plasma Cells |   |   |     | Macrophages |   |   |     | Fibroblasts/Fibrocytes |   |   |     |
|-------|---------|----|--------------------------|---|---|-----|-------------|---|---|-----|------------------------|---|---|-----|
|       |         |    | 1                        | 2 | 3 | Sum | 1           | 2 | 3 | Sum | 1                      | 2 | 3 | Sum |
| 3118  | hu r di |    | 0                        | 0 | 1 | 1   | 1           | 2 | 2 | 5   | 0                      | 0 | 0 | 0   |
|       | hu r pr | x  | 0                        | 0 | 0 | 0   | 1           | 1 | 1 | 3   | 0                      | 0 | 0 | 0   |
|       | hu l di | x  | 1                        | 0 | 0 | 1   | 2           | 1 | 1 | 4   | 0                      | 0 | 0 | 0   |
|       | fe r di |    | 0                        | 1 | 0 | 1   | 1           | 1 | 1 | 3   | 0                      | 0 | 0 | 0   |
|       | fe r pr | x  | 0                        | 0 | 0 | 0   | 1           | 0 | 0 | 1   | 0                      | 0 | 0 | 0   |
|       | fe l di | x  | 0                        | 0 | 0 | 0   | 1           | 1 | 1 | 3   | 0                      | 0 | 0 | 0   |
|       | fe l pr |    | 1                        | 0 | 0 | 1   | 1           | 1 | 1 | 3   | 0                      | 0 | 0 | 0   |
| 3119  | hu r di |    | 1                        | 0 | 0 | 1   | 1           | 1 | 1 | 3   | 0                      | 1 | 0 | 1   |
|       | hu r pr | x  | 1                        | 1 | 0 | 2   | 1           | 1 | 1 | 3   | 0                      | 0 | 0 | 0   |
|       | hu l di | x  | 0                        | 0 | 0 | 0   | 1           | 1 | 1 | 3   | 0                      | 0 | 0 | 0   |
|       | hu l pr |    | 0                        | 1 | 0 | 1   | 1           | 1 | 1 | 3   | 0                      | 0 | 0 | 0   |
|       | fe r di |    | 0                        | 0 | 0 | 0   | 1           | 1 | 1 | 3   | 0                      | 0 | 0 | 0   |
|       | fe r pr | x  | 0                        | 0 | 0 | 0   | 1           | 1 | 1 | 3   | 0                      | 0 | 0 | 0   |
|       | fe l di | x  | 0                        | 0 | 0 | 0   | 1           | 1 | 1 | 3   | 0                      | 0 | 0 | 0   |
|       | fe l pr |    | 0                        | 0 | 0 | 0   | 1           | 1 | 1 | 3   | 0                      | 0 | 0 | 0   |

**Suppl. Table 2. Semi-Quantitative Analysis of the Cellular Content After 8 Weeks Implantation of PLGA/CaP and PLGA/Ag-CaP Applying a Score System in Three Different Zones from Border to Centre of the Former Defect: Scores (0 for None, 1 for 1-5, 2 for 6-10, 3 for > 11) for the Absolute Number of the Cells Per Power Field and the Corresponding Sum for Each Defect**

| Sheep | Defect  | Ag | Foreign Body Giant Cells |   |   |     | Macrophages Circles |   |   |     | Bone Islands |   |   |     | Osteoclasts |   |   |     |
|-------|---------|----|--------------------------|---|---|-----|---------------------|---|---|-----|--------------|---|---|-----|-------------|---|---|-----|
|       |         |    | 1                        | 2 | 3 | Sum | 1                   | 2 | 3 | Sum | 1            | 2 | 3 | Sum | 1           | 2 | 3 | Sum |
| 3118  | hu r di |    | 0                        | 1 | 0 | 1   | 0                   | 1 | 0 | 1   | 0            | 1 | 0 | 1   | 0           | 0 | 0 | 0   |
|       | hu r pr | x  | 1                        | 1 | 0 | 2   | 2                   | 1 | 1 | 4   | 1            | 1 | 1 | 3   | 1           | 0 | 0 | 1   |
|       | hu l di | x  | 0                        | 0 | 1 | 1   | 1                   | 1 | 1 | 3   | 0            | 1 | 0 | 1   | 1           | 1 | 0 | 2   |
|       | fe r di |    | 0                        | 0 | 0 | 0   | 1                   | 1 | 1 | 3   | 0            | 1 | 1 | 2   | 1           | 0 | 1 | 2   |
|       | fe r pr | x  | 0                        | 0 | 0 | 0   | 0                   | 0 | 0 | 0   | 1            | 0 | 0 | 1   | 1           | 0 | 0 | 1   |
|       | fe l di | x  | 0                        | 1 | 0 | 1   | 0                   | 0 | 1 | 1   | 1            | 1 | 1 | 3   | 1           | 0 | 0 | 1   |
|       | fe l pr |    | 0                        | 1 | 1 | 2   | 0                   | 1 | 0 | 1   | 1            | 1 | 1 | 3   | 1           | 1 | 0 | 2   |
| 3119  | hu r di |    | 0                        | 0 | 0 | 0   | 0                   | 1 | 1 | 2   | 0            | 1 | 0 | 1   | 0           | 0 | 0 | 0   |
|       | hu r pr | x  | 1                        | 1 | 0 | 2   | 1                   | 1 | 0 | 2   | 0            | 1 | 0 | 1   | 0           | 0 | 0 | 0   |
|       | hu l di | x  | 0                        | 1 | 0 | 1   | 0                   | 1 | 1 | 2   | 0            | 1 | 0 | 1   | 0           | 0 | 0 | 0   |
|       | hu l pr |    | 0                        | 0 | 0 | 0   | 0                   | 1 | 1 | 2   | 0            | 1 | 1 | 2   | 1           | 0 | 0 | 1   |
|       | fe r di |    | 0                        | 0 | 1 | 1   | 1                   | 1 | 1 | 3   | 1            | 0 | 0 | 1   | 0           | 0 | 0 | 0   |
|       | fe r pr | x  | 0                        | 0 | 0 | 0   | 0                   | 0 | 1 | 1   | 1            | 0 | 0 | 1   | 1           | 0 | 0 | 1   |
|       | fe l di | x  | 0                        | 0 | 1 | 1   | 1                   | 2 | 1 | 4   | 1            | 1 | 0 | 2   | 1           | 1 | 0 | 2   |
|       | fe l pr |    | 0                        | 0 | 0 | 0   | 0                   | 0 | 1 | 1   | 0            | 0 | 1 | 0   | 0           | 0 | 0 |     |
